# Supplementary material
Source: PubMed Central journal article supplement (PMC5856593)

**A.**

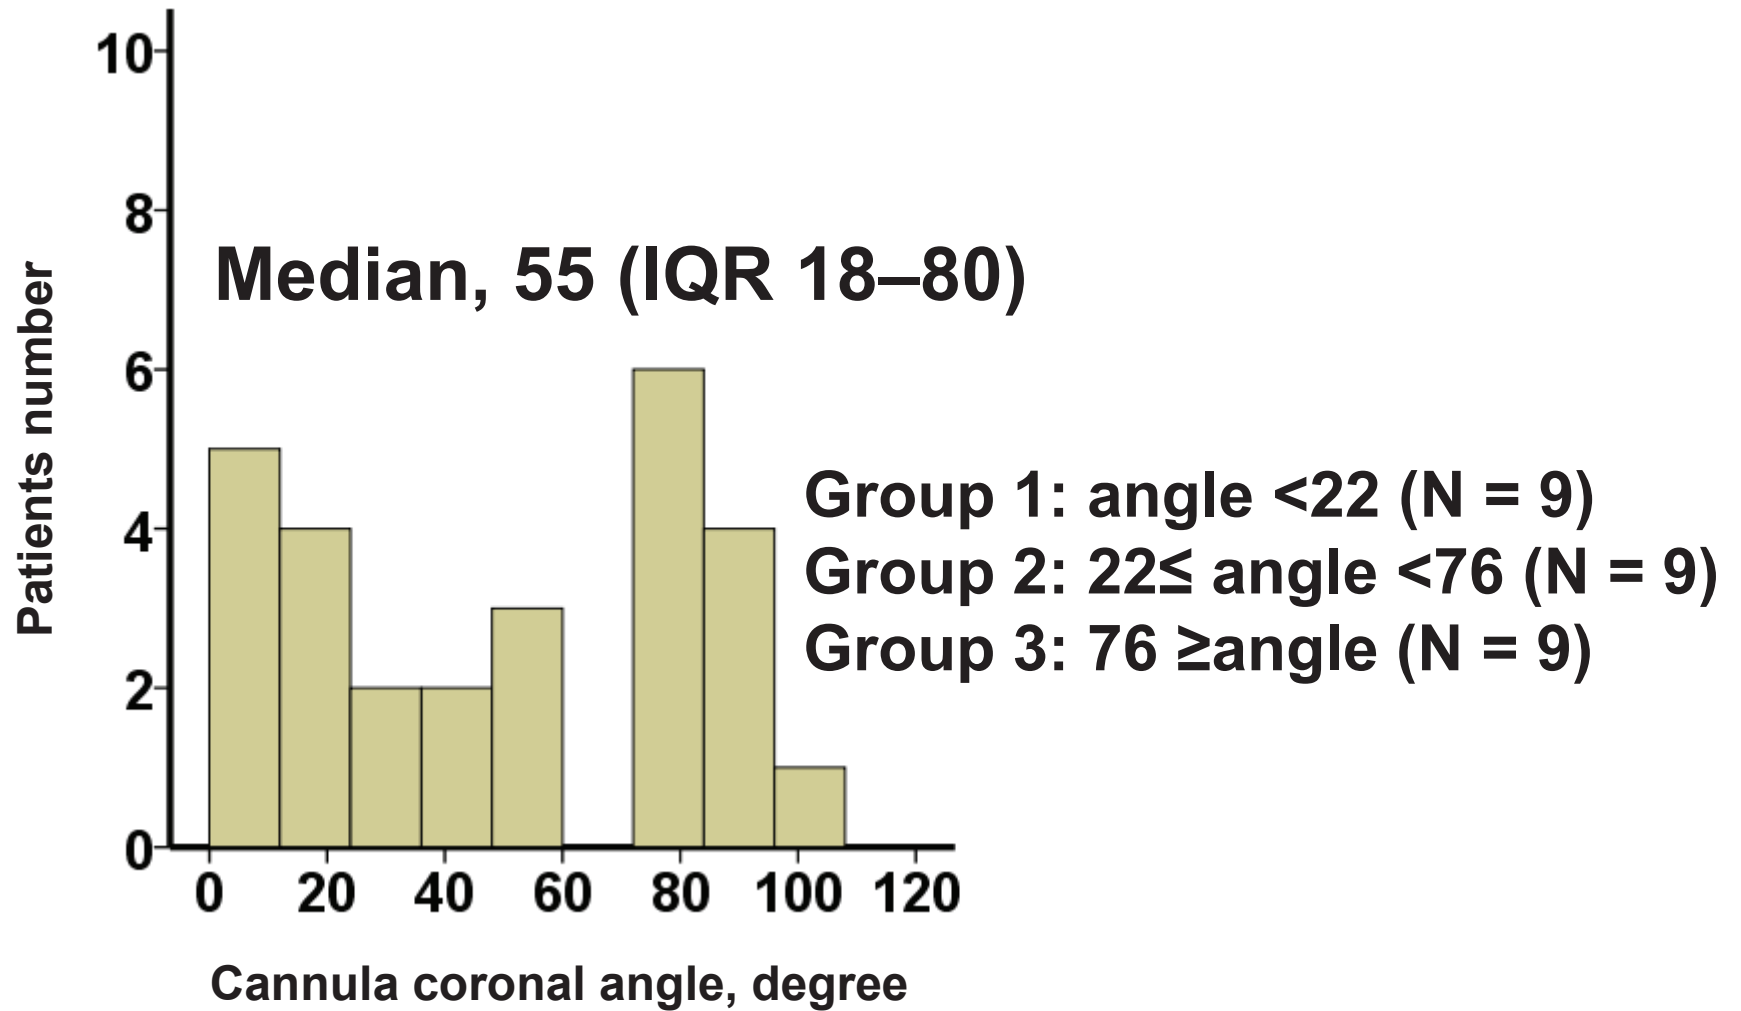

**Supplementary Figure 1**

Supplement: NIHMS927547-supplement-Fig_S1A.pdf [file NIHMS927547-supplement-Fig_S1A.pdf]

**B.**

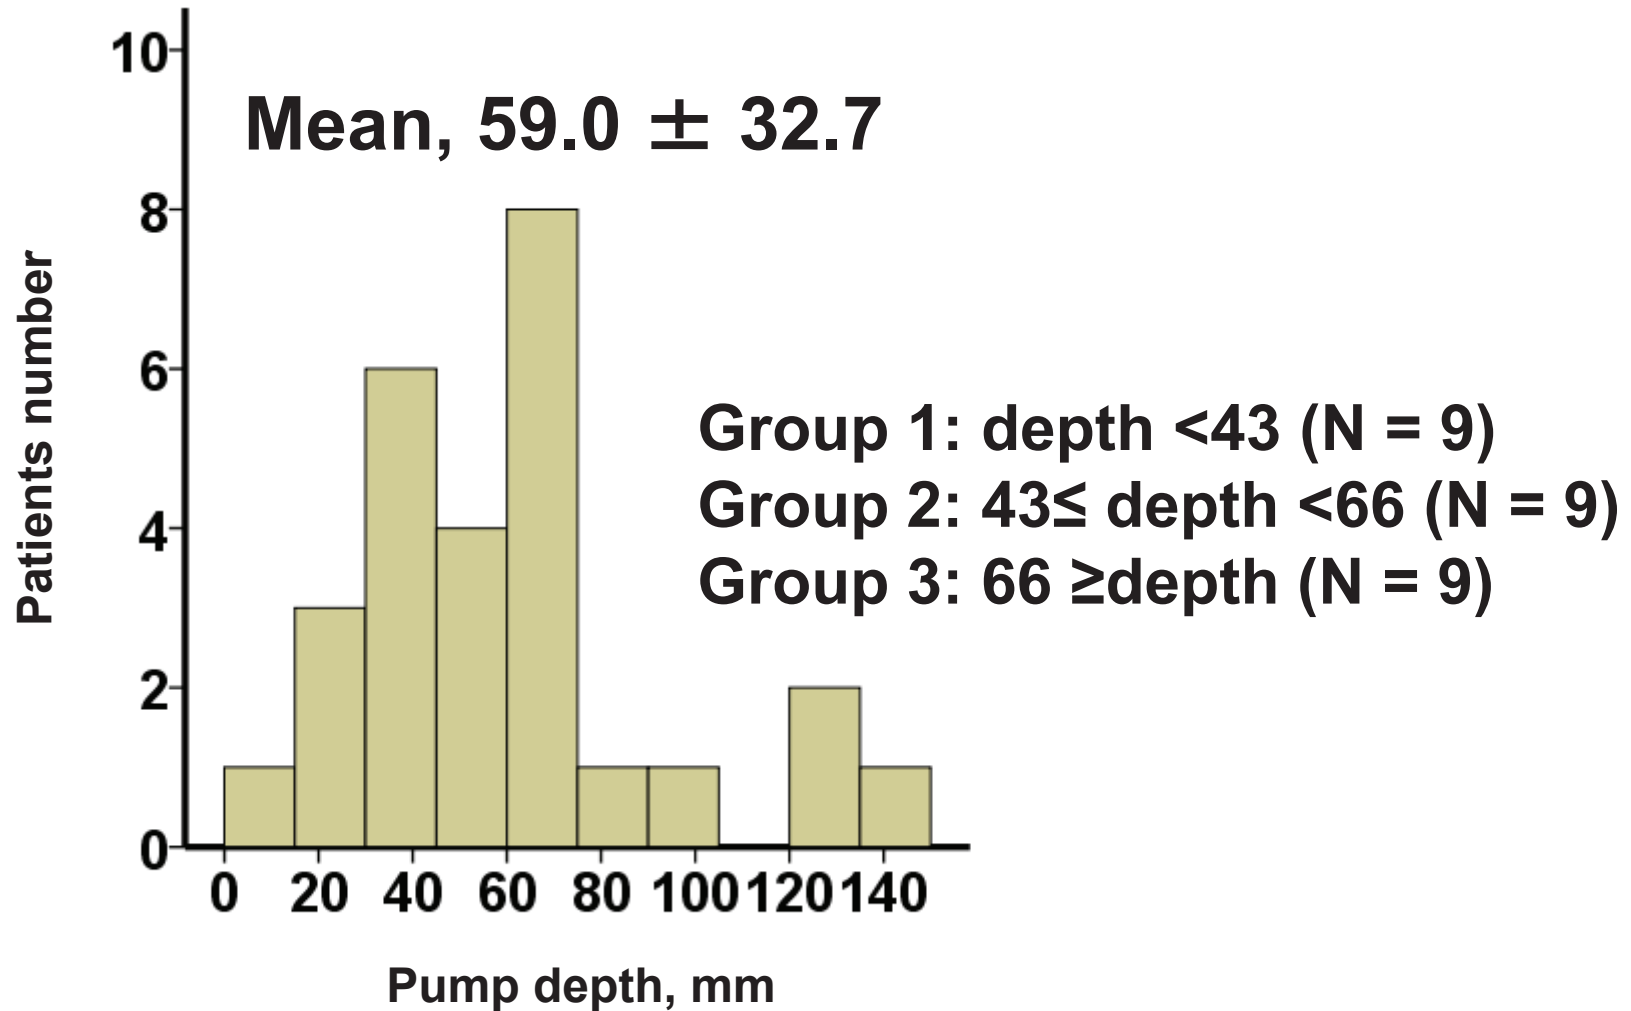

Supplementary Figure 1

Supplement: NIHMS927547-supplement-Fig_S1b.pdf [file NIHMS927547-supplement-Fig_S1b.pdf]

C.

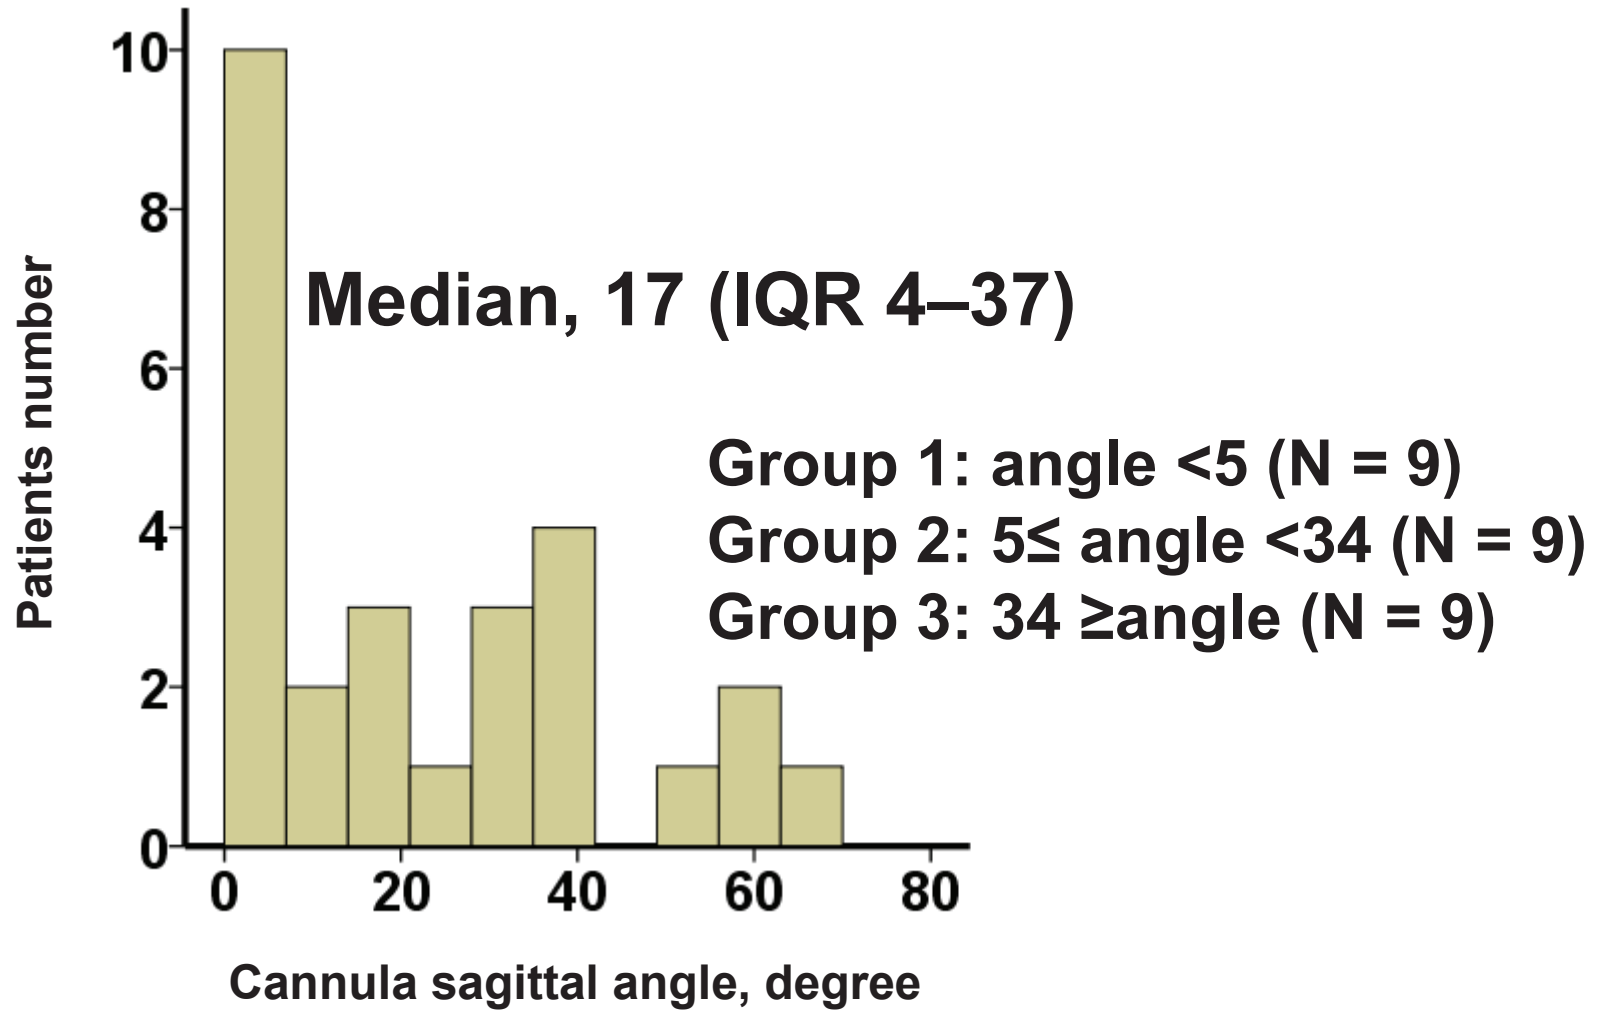

Supplementary Figure 1

Supplement: NIHMS927547-supplement-Fig_S1c.pdf [file NIHMS927547-supplement-Fig_S1c.pdf]
